# Supplementary material for: Preparation of fire-resistant poly(styrene-co-acrylonitrile) foams using supercritical CO2 technology
Source: Royal Society of Chemistry journal article supplement (doi:10.1039/b917539c), 2010-01-01
Supplement: b917539c.pdf [file b917539c.pdf]

## Supplementary data

### Preparation of fire-resistant poly(styrene-co-acrylonitrile) foams using the supercritical

#### CO<sub>2</sub> technology

Laetitia Urbanczyk,<sup>a</sup> Serge Bourbigot,<sup>b</sup> Cédric Calberg,<sup>c</sup> Christophe Detrembleur,<sup>a</sup> Christine Jérôme,<sup>\*a</sup> Frédéric Boschini,<sup>d</sup> and Michael Alexandre<sup>a</sup>

<sup>a</sup> *Center for Education and Research on Macromolecules (CERM),*

*University of Liège, Sart-Tilman B6a, 4000 Liège, Belgium. Fax: +32 43663497; Tel: +32*

*43663491, E-mail: [C.Jerome@ulg.ac.be](mailto:C.Jerome@ulg.ac.be)*

<sup>b</sup> *Equipe Procédés d'Elaboration de Revêtements Fonctionnels, LSPES*

*UMR-CNRS 8008, ENSCL, BP 90108, 59652 Villeeneuve d'Ascq*

*Cedex, France*

<sup>c</sup> *Department of Applied Chemistry, University of Liège, Sart-Tilman B6a,*

*4000 Liège, Belgium*

<sup>d</sup> *Laboratoire de Chimie Inorganique Structurale, University of Liège, Sart-Tilman B6a, 4000*

*Liège, Belgium*

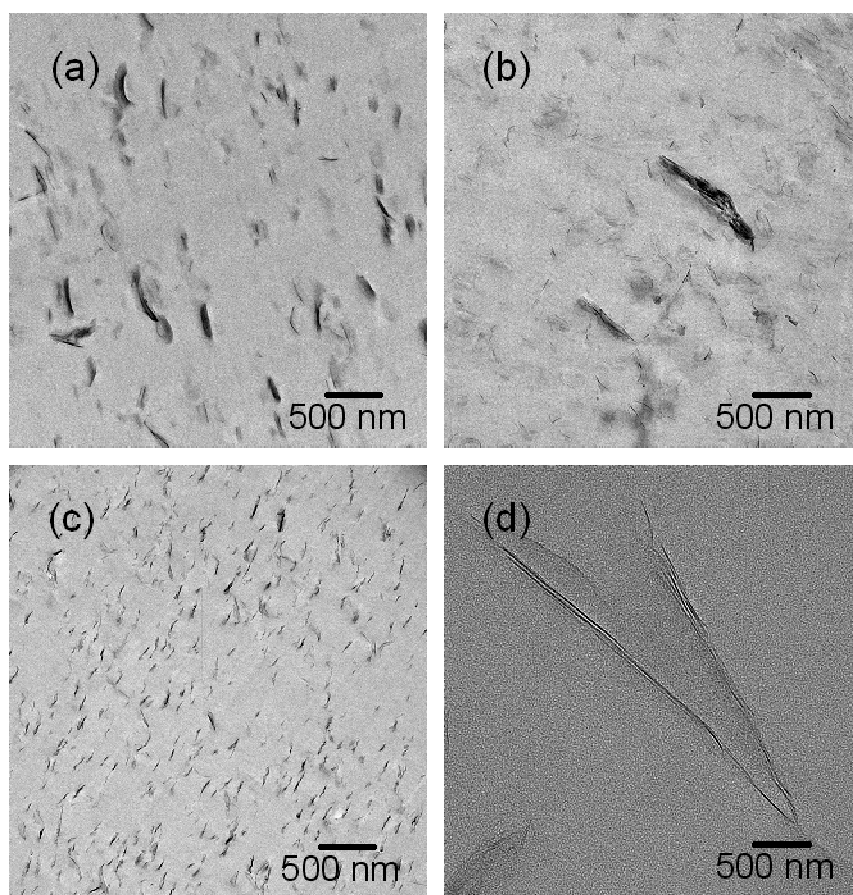

**Fig. S1** TEM analysis of SAN/clay nanocomposites: (a) SAN/3CNa, (b) SAN/3C30B, (c) SAN/3MB30B, (d) SAN/3MB30B at higher magnification.

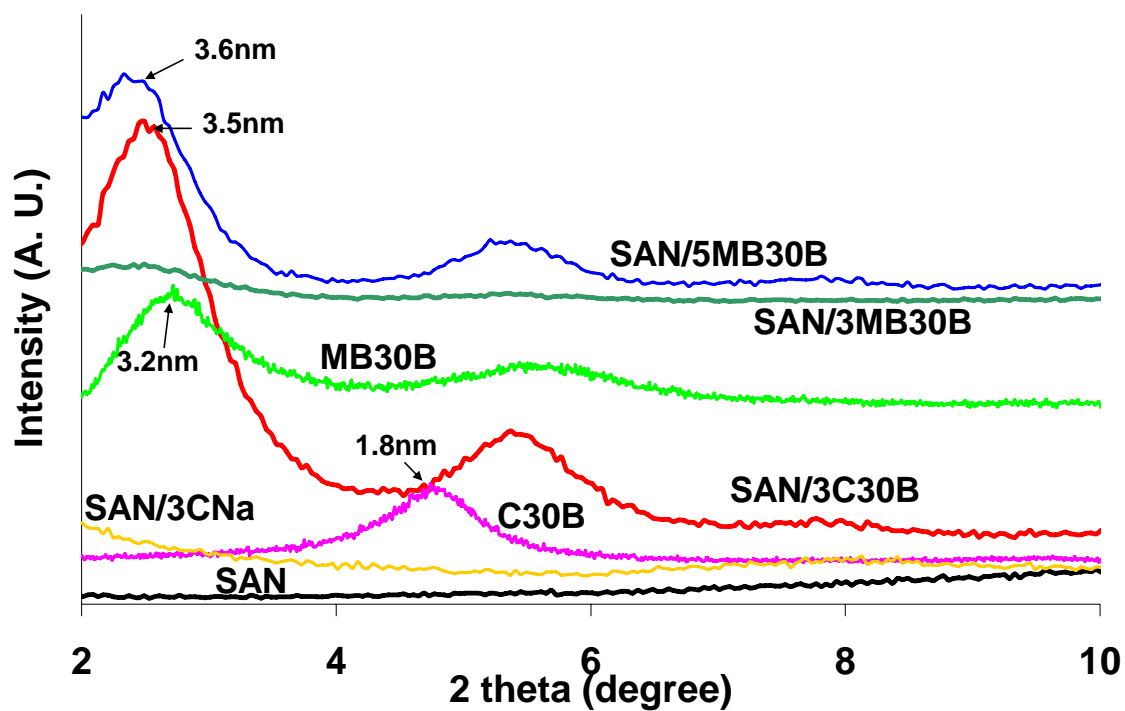

Fig S2 XRD patterns of clays and SAN/clay nanocomposites.

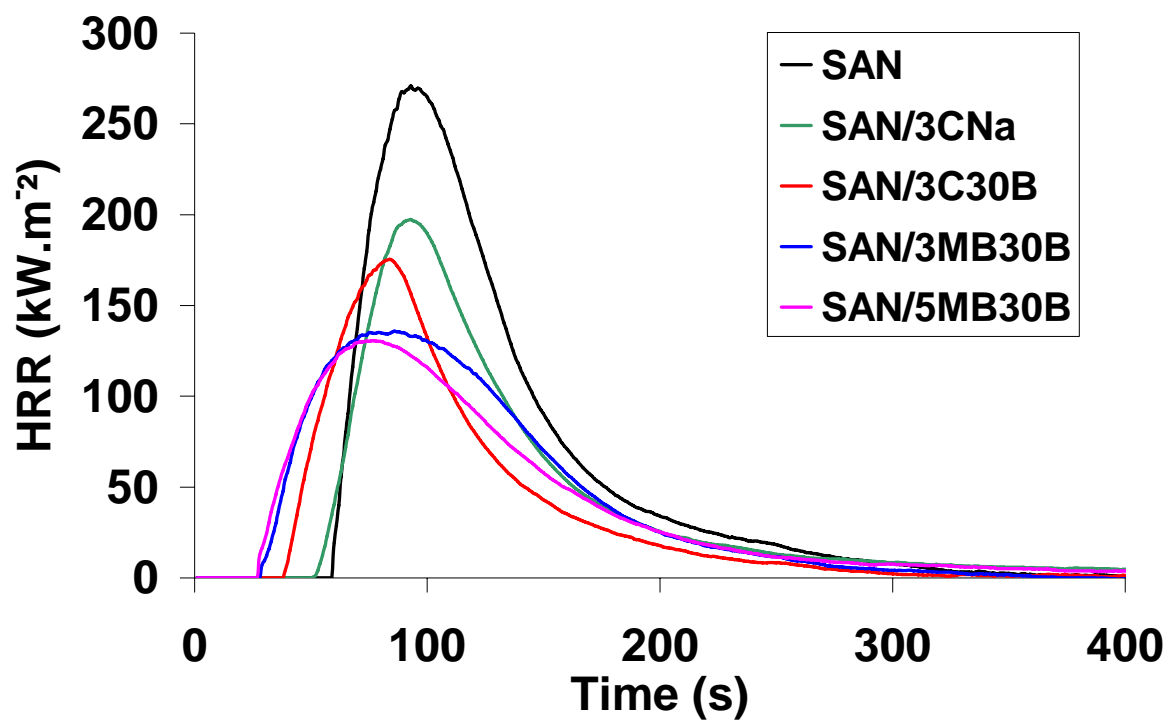

**Fig. S3** Heat release rate (HRR) plots of SAN and SAN/clay nanocomposite foams at  $35\text{kW.m}^{-2}$  heat flux in the  $0.13\text{-}0.15\text{g.cm}^{-3}$  density range.

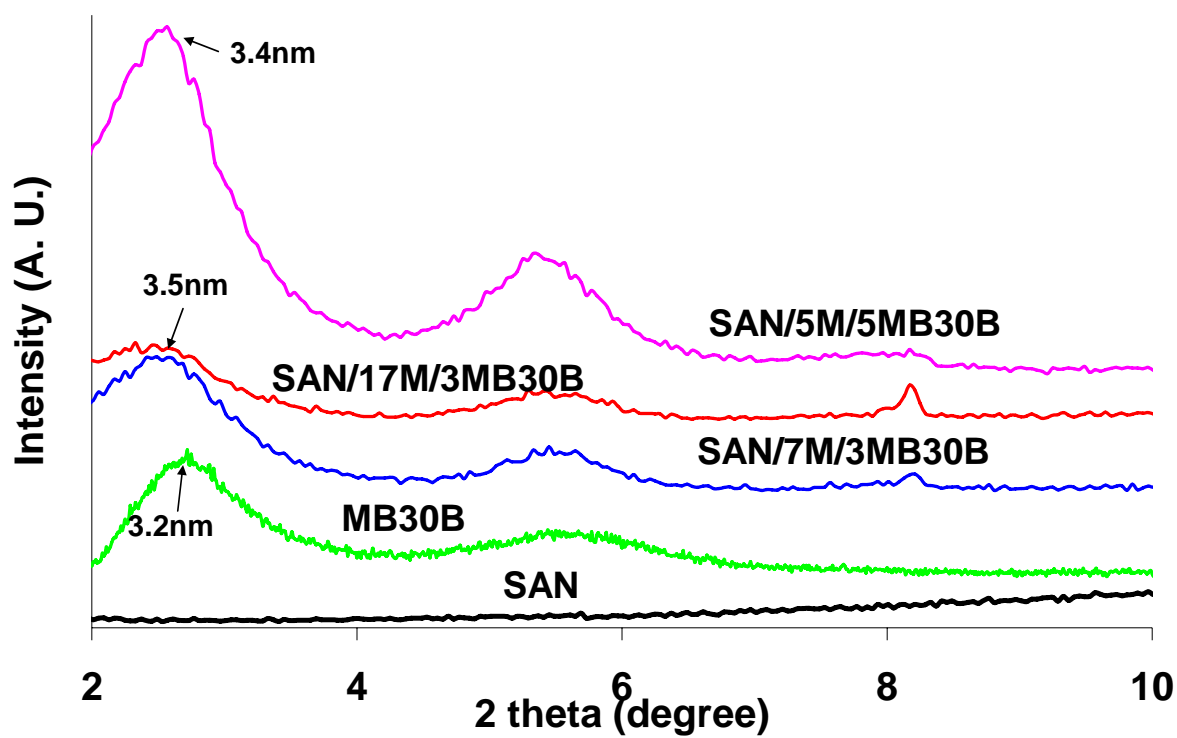

Fig. S4 XRD patterns of SAN/MPP/clay nanocomposites.

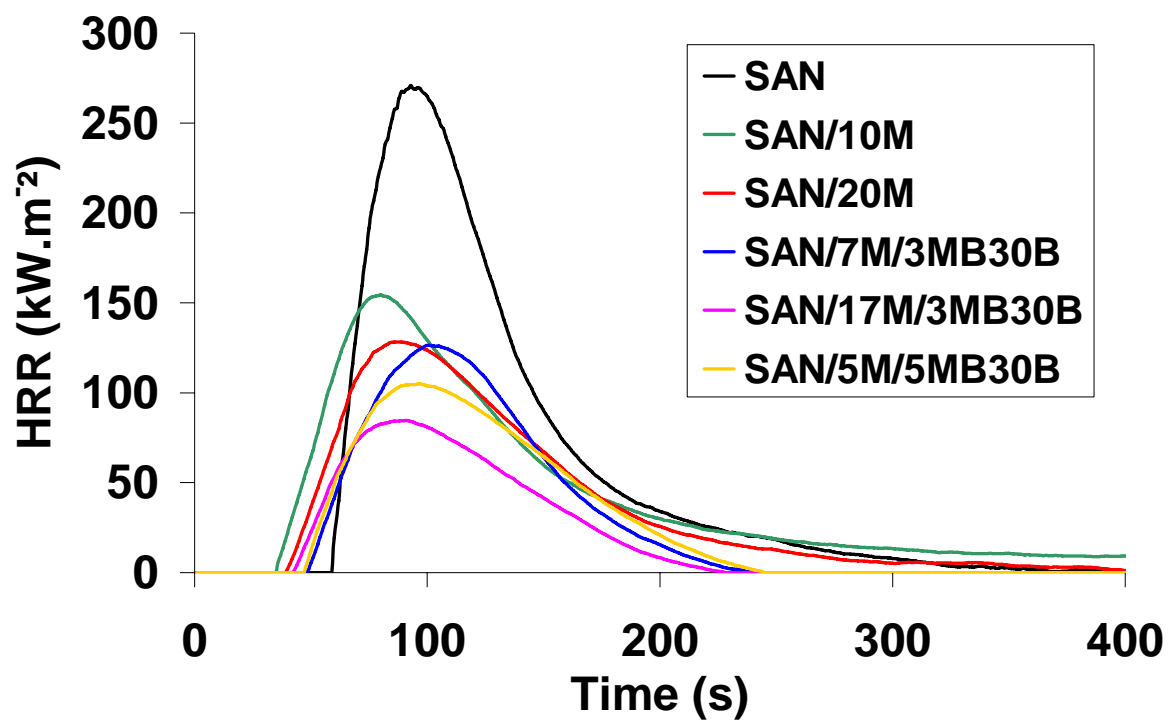

**Fig. S5** Heat release rate (HRR) plots of SAN/MPP and SAN/MPP/clay nanocomposite foams at  $35\text{kW}\cdot\text{m}^{-2}$  heat flux.

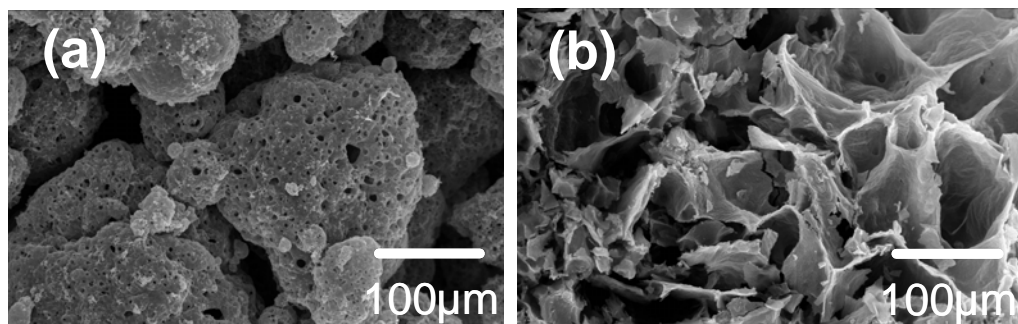

**Fig. S6** SEM pictures of the foam-like char obtained after cone calorimetry test : a) SAN/3MB30B, b) SAN/5M/5MB30B.

| <b>Foamed sample</b> | <b>Cell size range (<math>\mu\text{m}</math>)</b> | <b>Cell density (<math>10^{-8}</math> cells.<math>\text{cm}^{-3}</math>)</b> |
|----------------------|---------------------------------------------------|------------------------------------------------------------------------------|
| SAN                  | 20-70                                             | 2.5                                                                          |
| SAN/3CNa             | 10-40                                             | 5.2                                                                          |
| SAN/3C30B            | 10-100                                            | 0.8                                                                          |
| SAN/3MB30B           | 2-20                                              | 50                                                                           |
| SAN/5MB30B           | 0.2-4                                             | 15000                                                                        |
| SAN/10M              | 2-25                                              | 26                                                                           |
| SAN/20M              | 2-20                                              | 43                                                                           |
| SAN/7M/3MB30B        | 5-40                                              | 13.5                                                                         |
| SAN/17M/3MB30B       | 5-50                                              | 13                                                                           |
| SAN/5M/5MB30B        | 5-70                                              | 22                                                                           |

**Table S1** Cell size and cell density of SAN, SAN/clay, SAN/MPP and SAN/MPP/clay nanocomposite foams.
